# Supplementary material for: Age- and sex-specific effects on weight loss outcomes in a comparison of sleeve gastrectomy and Roux-en-Y gastric bypass: a retrospective cohort study
Source: PubMed Central journal article supplement (PMC4510900; doi:10.1186/2052-9538-1-12), 2014-08-11
Supplement: 40608_2014_12_MOESM2_ESM.pdf [file 40608_2014_12_MOESM2_ESM.pdf]

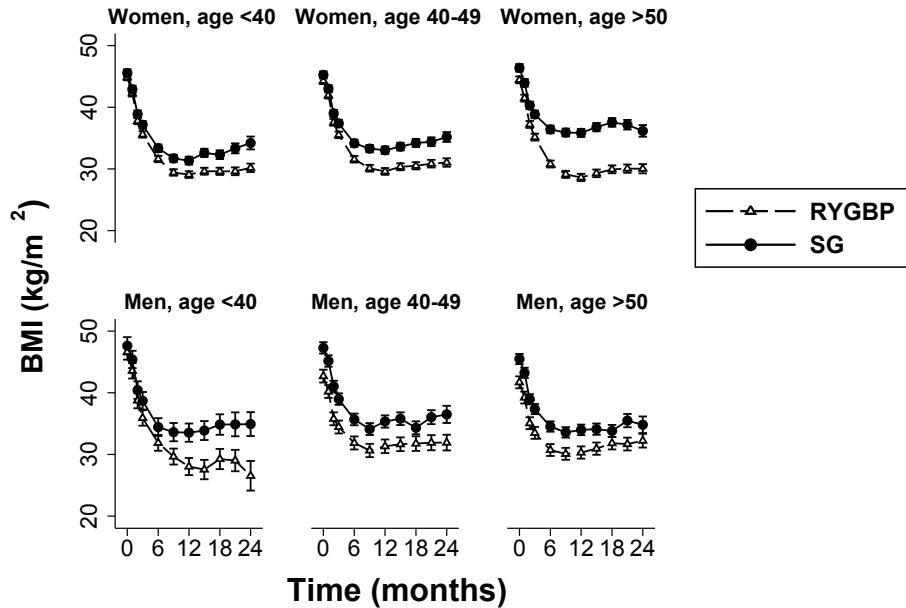

Supplementary Figure S1
